# Supplementary material for: Economic cost of substandard and falsified human medicines and cosmetics with banned ingredients in Tanzania from 2005 to 2015: a retrospective review of data from the regulatory authority
Source: PubMed Central journal article supplement — BMJ Open. 2018 Jun 27;8(6):e021825. doi: 10.1136/bmjopen-2018-021825 (PMC6020956; doi:10.1136/bmjopen-2018-021825), 2018-06-27
Supplement: bmjopen-2018-021825.draft_revisions.pdf [file bmjopen-2018-021825.draft_revisions.pdf]

# BMJ Open

BMJ Open is committed to open peer review. As part of this commitment we make the peer review history of every article we publish publicly available.

When an article is published we post the peer reviewers' comments and the authors' responses online. We also post the versions of the paper that were used during peer review. These are the versions that the peer review comments apply to.

The versions of the paper that follow are the versions that were submitted during the peer review process. They are not the versions of record or the final published versions. They should not be cited or distributed as the published version of this manuscript.

BMJ Open is an open access journal and the full, final, typeset and author-corrected version of record of the manuscript is available on our site with no access controls, subscription charges or pay-per-view fees (<http://bmjopen.bmj.com>).

If you have any questions on BMJ Open's open peer review process please email [info.bmjopen@bmj.com](mailto:info.bmjopen@bmj.com)

# BMJ Open

## The economic cost of substandard and falsified human medicines and cosmetics with banned ingredients in Tanzania from 2005–2015: Implication for medicines regulatory policy

|                               |                                                                                                                                                                                                                                                                                                                                   |
|-------------------------------|-----------------------------------------------------------------------------------------------------------------------------------------------------------------------------------------------------------------------------------------------------------------------------------------------------------------------------------|
| Journal:                      | <i>BMJ Open</i>                                                                                                                                                                                                                                                                                                                   |
| Manuscript ID                 | bmjopen-2018-021825                                                                                                                                                                                                                                                                                                               |
| Article Type:                 | Research                                                                                                                                                                                                                                                                                                                          |
| Date Submitted by the Author: | 19-Jan-2018                                                                                                                                                                                                                                                                                                                       |
| Complete List of Authors:     | Mori, Amani; Universitetet i Bergen Institutt for indremedisin, Global Public Health and Primary Care; Muhimbili University of Health and Allied Sciences, School of Pharmacy<br>Meena, Estella; Tanzania Food and Drugs Authority<br>Kaale, Eliangiringa; Muhimbili University of Health and Allied Sciences, School of Pharmacy |
| Keywords:                     | Health economics < HEALTH SERVICES ADMINISTRATION & MANAGEMENT, HEALTH ECONOMICS, Health & safety < HEALTH SERVICES ADMINISTRATION & MANAGEMENT, Health policy < HEALTH SERVICES ADMINISTRATION & MANAGEMENT, PUBLIC HEALTH                                                                                                       |
|                               |                                                                                                                                                                                                                                                                                                                                   |

SCHOLARONE™  
Manuscripts

1  
2  
3  
4  
5 **The economic cost of substandard and falsified human medicines and**  
6 **cosmetics with banned ingredients in Tanzania from 2005–2015: Implication**  
7 **for medicines regulatory policy**  
8  
9  
10  
11  
12  
13

14 Amani Thomas Mori <sup>1,3,\*</sup> , Estella Meena<sup>2</sup>, Eliangiringa A. Kaale<sup>3</sup>  
15  
16  
17  
18  
19  
20

21 <sup>1</sup> Centre for International Health, Department of Global Public Health and Primary Care,  
22 University of Bergen, P.O. Box 7804, 5020 Bergen, Norway  
23  
24  
25

26 <sup>2</sup> Tanzania Food and Drugs Authority, P.O. Box 77150 Dar es Salaam, Tanzania  
27  
28

29 <sup>3</sup> Muhimbili University of Health and Allied Sciences, P.O. Box 65001 Dar es Salaam, Tanzania  
30  
31  
32

33 \* Corresponding author  
34  
35

36 Emails: pax\_amani@yahoo.com  
37

38 Mobile no: +4794433988  
39  
40  
41  
42  
43  
44  
45  
46  
47  
48  
49  
50  
51  
52  
53  
54  
55  
56  
57  
58  
59  
60

## ABSTRACT

**Objective:** To estimate the economic cost of substandard and falsified human medicines and cosmetics with banned ingredients in Tanzania from 2005–2015.

**Design:** A retrospective review of data.

**Setting:** Tanzania Food and Drugs Authority and premises dealing with importations and distributions of pharmaceuticals.

**Eligibility criteria:** Confiscation reports of substandard human medicines, falsified human medicines and cosmetics with banned ingredients.

**Primary and secondary outcome measures:** Quantities and costs of pharmaceutical products, costs of transportation, storage, court cases and disposal of products.

**Results:** The economic cost of substandard and falsified human medicines and cosmetics with banned ingredients was estimated at 16.2 million US\$ i.e. substandard 13.7 million US\$, falsified 0.2 million US\$, cosmetics with banned ingredients 1.3 million US\$ and other costs 1.1 million US\$. Substandard medicines alone accounted for 84.6% of the total cost. The economic cost increased from 89.8 US\$ in 2005 to 6.8 million US\$ in 2014. The identified substandard and falsified human medicines include commonly used antibiotics, antimalarials, antiretroviral drugs, antipyretics and vitamins among others.

**Conclusion:** The economic cost of substandard and falsified human medicines and cosmetics with banned ingredients represent a relatively large loss of scarce resources for a poor country like Tanzania. The increase in the quantities identified and the economic cost of these products over time could partly be due to improved regulatory capacity in terms of human resources, infrastructure and frequency of inspections.

## ARTICLE SUMMARY

### Strengths and limitations of this study

- This is the first study from a low-income country to use national representative data to estimate the economic cost of poor-quality medicines and cosmetics with banned ingredients over a ten-year period.
- We were able to identify the manufactures of substandard medicines and purported manufacturers for falsified medicines, which enabled us to isolate those whose products were more frequently found in the market.
- Some data particularly for cosmetics, were poorly recorded, which made it difficult to apply the proper costing approach of identification, quantification and valuation.
- The sharp increase in quantities and cost could be due to increased availability of data because of improved regulatory capacity and public awareness, as opposed to an absolute increase in the problem of poor-quality medicines and cosmetics.
- We were not able to include patient and health system costs for morbidities and mortalities associated with the use of poor-quality medicines and cosmetics with banned ingredients; hence, the study underestimates the actual economic cost.

## INTRODUCTION

In June 2012, customs officials in Luanda-Angola seized a cargo with about 1.4 million packets of fake Coartem<sup>®</sup> (artemether-lumefantrine) hidden in loudspeakers. The cargo originated from Guangzhou in southern China, and the amount of fake antimalarials was estimated to be enough to treat more than half of all annual malaria cases in Angola [1]. This example highlights the problem of substandard and falsified medicines (defined in **Box 1**) and its potential public health impact. Substandard and falsified medicines represent about 10% of all medicines sold in low- and middle-income countries [2]. Expenditure on these products in low- and middle-income countries is estimated at 30.5 billion US\$ [2]. Falsified medicines represent one of the most lucrative criminal business and is estimated to be worth between 75–200 billion US\$ [3].

The use of substandard and falsified medicines and cosmetics with banned ingredients can have a tremendous negative impact on patient's health, that can range from serious harm to treatment failure that can lead to severe illness and death. It is estimated that between 90,000–200,000 malaria deaths could be prevented if all antimalarials were genuine [4, 5]. Sub-therapeutic plasma levels due to poor-quality medicines are strongly associated with emergence of antimicrobial resistance [6, 7], hence increasing costs of treatment by switching from cheap first-line medicines to more expensive second-line medicines. The pharmaceutical industry is also a victim of falsified medicines, with annual losses estimated to be 45 million Euros, which consequently reduces investments in innovative research and development [8].

**Box 1:** Definitions of substandard medicines, falsified medicines

*Substandard medicines:* According to WHO, these are genuine medicines that are authorized by the national medicines authorities, but which fails to meet national or international quality standards or specifications.

*Falsified medicines:* According to WHO, these represent deliberately and fraudulently labeled medicines with respect to identity, composition and source and may include products with the correct or wrong ingredients, without active ingredients, with insufficient active ingredients or with fake packaging [9].

1  
2  
3 Low-income countries are the prime targets of substandard and falsified medicines because  
4 regulatory agencies and law enforcement systems are relatively weak, accompanied by poorly  
5 regulated markets, and scarcity and/or erratic supply of basic medicines [10, 11]. Porous borders  
6 and complex supply chain system of pharmaceuticals also contributes to the problem. There is  
7 scarcity of national level data from low-income countries despite all evidences pointing towards  
8 an increasing problem of substandard and falsified medicines. Therefore, the objective of this  
9 study was to estimate the economic cost of substandard and falsified human medicines including  
10 cosmetics with banned ingredients in Tanzania from 2005–2015.  
11  
12  
13  
14  
15  
16  
17  
18

## 19 **METHODS**

20  
21  
22 This costing study used an ingredient approach to estimate the economic cost of substandard and  
23 falsified human medicines and cosmetics with banned ingredients between 2005–2015. This  
24 method involves identification, quantification and valuation of individual items. Costing was  
25 done from the perspective of the regulatory authority and the pharmaceutical distributors. We did  
26 not include patient and health system costs because of scarcity of data on morbidities and  
27 mortalities likely to be caused by the use of these products.  
28  
29  
30  
31  
32

### 33 **Sources of data**

34  
35  
36 We used data from the regulatory authority and the major importers and distributors of  
37 pharmaceuticals from 2005–2015. The regulatory authority usually keeps all the confiscation  
38 reports for poor-quality medicines and cosmetics that are collected during routine inspections of  
39 premises and major operations. The report usually contains among other information, the name  
40 of the premise, generic and brand names of the product, strength, physical description of the  
41 package and products, batch number, manufacturing and expiry dates as well as the quantities  
42 and sometimes an estimated value. Premises usually remain with the signed copy of the  
43 confiscation report. In this study we retrieved all the confiscation data that was available at the  
44 regulatory authority's headquarter and from its zonal offices. This data was complemented with  
45 that from the importers and distributors of pharmaceuticals and we were careful to avoid double  
46 counting. We also conducted a series of structured interviews with officials at the regulatory  
47 authority, importers and distributors to estimate operational cost incurred in the process of  
48  
49  
50  
51  
52  
53  
54  
55  
56  
57  
58  
59  
60

1  
2  
3 confiscation, withdraw of products from the market, storage, disposal and court cases.  
4  
5 Unregistered and expired medicines were not included.  
6  
7

### 8 **Cost estimates**

9 The study used the median buyer prices from the International Drug Price Indicator Guide  
10 (IDPIG) as a primary source of medicines prices and when they were not available the Medical  
11 Stores Price Catalogue of 2015/16 was used. In the absence of median buyer prices, the median  
12 supplier prices were used, with an inflation factor of 10% as recommended in the costing studies  
13 [12]. Prices from the IDPIG were inflated further by 10% to account for local opportunity costs.  
14 Cost was calculated by multiplying the tallied quantities with unit prices for item. In some cases,  
15 only the estimated value of the items in the local currency were reported without information  
16 about the identity and quantities and this was common for cosmetics. In this case the total value  
17 in the local currency was first converted to US\$ by using relevant exchange rate for that year  
18 before adjusting to the present value using relevant consumer price indices.  
19  
20  
21  
22  
23  
24  
25  
26

27 In addition, the study included storage costs, transportation costs, cost of disposal and cost  
28 charges for court cases. We measured the storage space (m<sup>2</sup>) which was multiplied by 10 US\$/m<sup>2</sup>  
29 which was the rate of rental charge used for warehouses by the Tanzania National Housing  
30 Corporation (NHC) and reported by most distributors of pharmaceuticals. Yearly storage costs  
31 were obtained by multiplying monthly rental charges by 12. Storage costs for the importers and  
32 distributors was considered only for the year when there was an incident of confiscation of  
33 substandard or falsified medicine or cosmetics with banned ingredients.  
34  
35  
36  
37  
38  
39

### 40 **Ethical considerations**

41 Ethical approval was obtained from the research and publication committee of the Muhimbili  
42 University of Health and Allied Sciences (MUHAS). The regulatory authority also granted  
43 research permission and issued an official letter to all local importers and distributors requesting  
44 them to make the relevant data available to the researchers and assuring them that the data  
45 requested will be used for research purpose only. A consent form was provided to all the  
46 interviewees and signed prior to interviews.  
47  
48  
49  
50  
51  
52  
53  
54  
55  
56  
57  
58  
59  
60



## RESULTS

### Economic cost

The estimated economic cost of substandard and falsified human medicines and cosmetics with banned ingredients in Tanzania from 2005–2015 was 16.20 million US\$. Substandard medicines contributed 13.65 million US\$, falsified medicines 149,369 US\$ and cosmetics with banned ingredients 1.29 million US\$. Other costs that include transportation, storage, court cases and disposal contributed 1.09 million US\$ (Table 1).

Table 1: Costs of the products and other associated costs

| Year         | Cost (US\$)      |                     |                    |                    | Total               |
|--------------|------------------|---------------------|--------------------|--------------------|---------------------|
|              | Falsified        | Substandard         | Cosmetics          | Other cost         |                     |
| 2005         | 33.3             | 56.5                | 0.0                | 0.0                | 89.8                |
| 2006         | 49.9             | 0.0                 | 0.0                | 0.0                | 49.9                |
| 2007         | 63.8             | 19,424.4            | 162,478.8          | 51,720.9           | 233,688.0           |
| 2008         | 96.7             | 0.0                 | 42,979.2           | 138,929.7          | 182,005.6           |
| 2009         | 1,701.6          | 58,032.3            | 180,158.7          | 97,782.9           | 337,675.5           |
| 2010         | 17.6             | 57,299.5            | 52,983.1           | 117,907.7          | 228,207.9           |
| 2011         | 1,676.4          | 398,474.0           | 123,347.6          | 103,913.3          | 627,411.3           |
| 2012         | 141,493.3        | 3,530,672.6         | 91,968.4           | 180,557.0          | 3,944,691.2         |
| 2013         | 2,129.9          | 1,808,340.3         | 131,273.7          | 149,425.8          | 2,091,169.6         |
| 2014         | 1,724.2          | 6,453,613.0         | 240,335.9          | 112,258.6          | 6,807,931.8         |
| 2015         | 382.7            | 1,326,139.4         | 265,326.6          | 134,143.4          | 1,725,992.1         |
| <b>Total</b> | <b>149,369.3</b> | <b>13,652,052.1</b> | <b>1,290,852.0</b> | <b>1,086,639.3</b> | <b>16,178,912.7</b> |

Between 2005 and 2011, the estimated annual economic cost increased from about 90 US\$ to 0.63 million US\$, with some fluctuation in between. The annual cost increased sharply to 3.94 million US\$ in 2012, then dropped to about 2.09 million in 2014. The annual total cost rose again to 6.8 million US\$ the following year (Figure 1). Substandard medicines contributed the highest proportion of total economic cost in 2005 and from 2011 to mid-2015, which range

1  
2  
3 between 63 to 95%. In 2006 only falsified medicines were recorded, while cosmetics with  
4 banned ingredients contributed the highest cost in 2007 and 2009 (Figure 2).  
5  
6  
7  
8  
9

## 10 **Quantities**

11  
12 Between 2005 to 2015, there was a total of 519,889,388 and 1,216,630 substandard and falsified  
13 human medicines, respectively. Dosage forms include tablets, capsules, oral suspensions and  
14 vials/ampoules for injections. Among the group of substandard medicines, quantities of  
15 antibiotics and antimalarials were 222,236,052 (66%) and 133,124,501 (10%), respectively  
16 (Figure 3). The group named "Other" which accounted for 24% of substandard human medicines  
17 consist of many items including aminophylline 47%, paracetamol 22%, diazepam 11% and  
18 prednisolone 9%. Among the commonly used antibiotics that were identified are penicillins,  
19 which included phenoxymethylpenicillin, amoxicillin and cloxacillin 83%, co-trimoxazole  
20 (Sulfamethoxazole/ Trimethoprim) 13%, erythromycin 3% and ciprofloxacin 0.4%. Among  
21 antimalarials, quinine accounted for 88% and sulfadoxine-pyrimethamine 10%.  
22  
23  
24  
25  
26  
27  
28  
29

30 For the group of falsified medicines, there were 819,660 tablets (67%) of antiretrovirals  
31 containing Stavudine/Lamivudine and Nevirapine, followed with antimalarials and antibiotics  
32 302,609 (25%) and 94,200 (8%), respectively (Figure 3). Among falsified antimalarials quinine  
33 and artemether-lumefantrine tablets were 171,900 (57%) and 504 (0.2%), respectively. Falsified  
34 antibiotics were only doxycycline capsules 68,000 and cloxacillin capsules 26,200.  
35  
36  
37  
38  
39  
40

## 41 **Manufacturers of substandard and purported manufacturers of falsified medicines**

42 Table 2 shows generic names of medicines and the coded names of manufactures of substandard  
43 medicines and purported manufacturers of falsified, which were repeatedly circulating in  
44 Tanzania between 2005–2015. Phenoxymethylpenicillin, ciprofloxacin, prednisolone, diazepam  
45 and salbutamol from manufacturer N were identified over several years implying consistent  
46 failure to meet Good Manufacturing Practice standards. The same was seen for manufacturer E,  
47 M and B for quinine, paracetamol and aminophylline, respectively.  
48  
49  
50  
51  
52  
53  
54  
55  
56  
57  
58  
59  
60

The same observation was also made for falsified medicines, in that falsified products bearing the name of the same purported manufacturer were consistently found on the market over several years. Example quinine and Sulphamethoxypyrazine/Pyrimethamine from manufacturer C and H, respectively, were identified circulating in the market over 3 years. This may imply that the culprits were not caught and continued to release the product into the market for several years, the sanctions were not deterrent, or the inspection and confiscation were not effective.

Table 2: Manufacturers of commonly identified poor-quality medicines

| Substandard medicines<br>(Manufacturers)         | Year |      |      |      |         |         |         |      |
|--------------------------------------------------|------|------|------|------|---------|---------|---------|------|
|                                                  | 2005 | 2009 | 2010 | 2011 | 2012    | 2013    | 2014    | 2015 |
| Phenoxyethylpenicillin                           |      |      |      | N    | N       | N       |         |      |
| Ciprofloxacin                                    |      |      |      | N    | N       |         |         |      |
| Quinine                                          |      |      |      |      | E       |         | E       |      |
| Prednisolone                                     |      |      | N    | N    | N       | N       |         |      |
| Paracetamol                                      |      |      |      |      | M       |         |         | M    |
| Diazepam                                         |      |      |      | N    | N       | N       |         | N    |
| Aminophylline                                    |      |      |      |      |         |         | B       | B    |
| Salbutamol                                       |      |      |      | N    | N       | N       |         |      |
|                                                  |      |      |      |      |         |         |         |      |
| Falsified medicines<br>(Purported manufacturers) | Year |      |      |      |         |         |         |      |
|                                                  | 2005 | 2008 | 2009 | 2011 | 2012    | 2013    | 2014    | 2015 |
| Quinine tablets                                  | B    |      |      |      | C       | B, C, D | C, D, E | B, C |
| Sulphamethoxypyrazine/Pyrimethamine              |      |      | H    | H, B |         | H, B    |         | K    |
| Sulfadoxine/Pyrimethamine                        |      |      |      |      | E, I, J | E       | C, J    |      |
| Halofantrine Hydrochloride                       | A    |      |      |      |         | A       |         |      |
| Artemether/Lumefantrine                          |      | F    |      | F    |         |         |         |      |
| Dihydroartemisinin/Piperaquine                   |      | G    | G    |      |         |         |         |      |

\* Letter code represents a name of manufacturer or purported manufacturer

## DISCUSSION

It is difficult to estimate the actual economic cost of substandard and falsified medicines in any country not least in a low-income setting because data are usually not available [13]. However, using data from the regulatory authority, pharmaceutical importers and distributors we were able to estimate this burden in Tanzania. Our findings show that the estimated economic cost of substandard and falsified human medicines and cosmetics with banned ingredients in Tanzania between 2005–2015 was 16.20 million US\$. Generally, the economic burden shows an increasing trend and the substandard medicines contribute the largest proportion of the total costs. The estimated economic cost represents 0.24% of the GDP, which is relatively large considering that Tanzania is one of the poorest countries in the world.

Based on the existing data, our analysis shows that there were large quantities of substandard and less falsified human medicines in Tanzania over the past ten years. This include commonly used inexpensive antibiotics such as phenoxymethypenicillin, amoxicillin, cloxacillin, erythromycin, sulfamethoxazole/trimethoprim; antimalarials such as quinine, sulfadoxine-pyrimethamine, sulphayrazime/pyrimetahmine and antiretrovirals among others. Use of poor-quality medicines is one of the main causes of antimicrobial resistance, which was recently declared by WHO as a major global public health threat as it causes treatment to be difficult and more expensive [2, 14]. Several studies have reported high levels of antibiotic resistance in Tanzania especially for commonly used and cheap antibiotics [15-18], which has prompted the government to develop a national action plan to curb antimicrobial resistance [19].

### Policy implications

The quantities and the economic cost of substandard and falsified human medicines including cosmetics with banned ingredients in Tanzania over the past ten years is alarming. Policy-makers in Tanzania need to improve the existing post-marketing surveillance (PMS) and pharmacovigilance (PV) system for effective prevention, detection and response to poor-quality products, adverse effects and other medicines-related health and economic problems. An effective PMS and PV systems are essential components of any healthcare system. However, in low-income countries including Tanzania such systems are weak or non-existent, hence health

1  
2  
3 problems associated with the use of substandard and falsified medicines such as adverse  
4 reactions, ineffective treatment or even death often go undetected.  
5  
6

7 The government and policy makers need to provide more resources to the regulatory authorities  
8 in Tanzania to enhance supervision and inspection to ensure integrity of the supply chain of  
9 pharmaceuticals both in the public and the private sectors. Limited access to affordable essential  
10 medicines in the public health system has resulted in the opening of a large number of private  
11 retail pharmacies and small accredited drug dispensing outlets in the country, which have proved  
12 very difficult to control [20]. As a consequence, malpractices are common including selling  
13 medicines without prescriptions, stocking medicines from unofficial sources, poor  
14 documentation and hiring of people without the required qualifications, making them the prime  
15 target for the business of substandard and falsified medicines [13].  
16  
17  
18  
19  
20  
21  
22  
23

24 The fact that some substandard and falsified human medicines from certain manufacturers were  
25 confiscated over several years raise a more serious concern. This was observed for example for  
26 falsified quinine tablets purporting to be from manufacturer B and C, and  
27 sulphamethoxypyrazine/pyrimethamine tablets mimicking that of manufacturer H. There could  
28 be several reasons behind this; first it could indicate a sign of insufficient inspection or  
29 ineffective removal of the product from the market. Secondly, it could be that the products were  
30 easy to be falsified and smuggled into the country; thirdly, poor compliance with Good  
31 Manufacturing Practices and lastly it could also imply that the culprits were not identified, or if  
32 identified the sanctions were not deterrent, hence continued to supply the products.  
33  
34  
35  
36  
37  
38  
39  
40

### 41 **Strengths and limitations**

42 To the best of our knowledge, this is the first study to systematically combine data retrieved from  
43 the regulatory authority, importers and distributors of pharmaceuticals to estimate the economic  
44 cost of substandard and falsified medicines and cosmetics with banned ingredients in a low-  
45 income country. The data also facilitated the identification of the manufactures of substandard  
46 medicines and manufacturers whose products were falsified, which enabled us to isolate those  
47 whose products were repetitively found circulating in the market. However, this study has  
48 several limitations. Firstly, we did not have morbidity and mortality data to facilitate the  
49 inclusion of patient and health system costs associated with the use of poor-quality medicines  
50  
51  
52  
53  
54  
55  
56  
57  
58  
59  
60

1  
2  
3 and cosmetics with banned ingredients. This means our study underestimates the actual  
4 economic cost of these products. Secondly, some data was poorly recorded, which made it  
5 difficult to follow the proper costing procedure of identification, quantification and valuation.  
6  
7  
8  
9

## 10 11 **CONCLUSION**

12 The economic cost of substandard and falsified human medicines and cosmetics with banned  
13 ingredients represent a relatively large loss of scarce resources for a low-income country like  
14 Tanzania. The increase in the quantities identified and the economic cost of these products over  
15 time could partly be due to improved regulatory capacity in terms of human resources,  
16 infrastructure, frequency of inspections, implementation of post-marketing surveillance,  
17 establishment of more zone offices, and strengthened quality control laboratory with WHO  
18 prequalification. These improvements in addition to efforts by the authority and the government  
19 to increase awareness among stakeholders could have positive and sustainable impact in the  
20 longer term. However, proliferation of retail drug outlets that are difficult to regulate and  
21 ineffective control of many porous borders will continue to be a challenge to the regulatory  
22 authority. Policy-makers should make the fight against substandard and falsified medicines a  
23 national priority agenda, including development of national strategies and action plans.  
24  
25  
26  
27  
28  
29  
30  
31  
32  
33

## 34 35 **Funding**

36 This research received no specific grant from any funding agency in the public, commercial or  
37 not-for-profit sectors  
38  
39  
40  
41

## 42 43 **Competing interests**

44 None  
45  
46

## 47 48 **Contributors**

49 ATM and EK conceived the idea of the study; ATM, EM and EK designed the study. EM  
50 collected the data. ATM and EM analyzed the data. ATM and EM wrote the first draft of the  
51 manuscript. All authors approved the final version of the manuscript.  
52  
53  
54  
55  
56  
57  
58  
59  
60

**REFERENCES**

1. Faucon B, Murphy C, and Whalen J. Africa's Malaria Battle: Fake Drug Pipeline Undercuts Progress, in *The Wallstreet Journal*. 2013: London. [Cited 2017 June 13]: Available at: <https://www.wsj.com/articles/SB10001424127887324474004578444942841728204>.
2. WHO. A study on the public health and socioeconomic impact of substandard and falsified medical products. 2017, World Health Organization: Geneva.
3. WHO. Counterfeit medicines. Revised Feb 2006. Fact sheet No. 275. 2006, World Health Organization: Geneva
4. Renschler, J.P., et al., Estimated Under-Five Deaths Associated with Poor-Quality Antimalarials in Sub-Saharan Africa. *Am J Trop Med Hyg*, 2015. **92**(Suppl 6): p. 119-26.
5. Clarke E, Counterfeit Medicines: The Pills That Kill in *Telegraph*. 2008 London [Cited 2017 June 13]: Available at: <http://www.telegraph.co.uk/news/health/3354135/Counterfeit-medicines-the-pills-that-kill.html>.
6. Lipsitch, M. and B.R. Levin. The population dynamics of antimicrobial chemotherapy. *Antimicrob Agents Chemother*, 1997. **41**(2): p. 363-73.
7. Pisani E. Antimicrobial resistance: What does medicine quality have to do with it? *Review on Antimicrobial Resistance*, 2015.
8. United Nations Interregional Crime and Justice Research Institute, *Counterfeit Medicines and Organized Crime*. 2012: Turin.
9. WHO. Seventieth World Health Assembly update, 29 May 2017. Geneva.
10. Caudron, J.M., et al., Substandard medicines in resource-poor settings: a problem that can no longer be ignored. *Trop Med Int Health*, 2008. **13**(8): p. 1062-72.
11. Newton, P.N., M.D. Green, and F.M. Fernandez. Impact of poor-quality medicines in the 'developing' world. *Trends Pharmacol Sci*, 2010. **31**(3): p. 99-101.
12. *Management Science for Health. International Drug Price Indicator Guide*, ed. J.E. Frye. Vol. 2014 Edition. Center for Pharmaceutical Management, Virginia: World Health Organization.

13. IOM (Institute of Medicine),.Countering the Problem of Falsified and Substandard Drugs. 2013, Washington, DC: National Academies Press.
14. WHO. Antimicrobia Resistance: Global Report on Surveillance. 2014: Geneva.
15. Blomberg, B., Antimicrobial resistance in bacterial infections in urban and rural Tanzania, in Institute of medicine Center for International health 2007, Bergen Norway: [http://bora.uib.no/bitstream/handle/1956/2265/Main\\_Thesis\\_Blomberg.pdf](http://bora.uib.no/bitstream/handle/1956/2265/Main_Thesis_Blomberg.pdf).
16. Moremi, N., H. Claus, and S.E. Mshana. Antimicrobial resistance pattern: a report of microbiological cultures at a tertiary hospital in Tanzania. *BMC Infect Dis*, 2016. **16**(1): p. 756.
17. Blomberg, B. Fake medicines, a threat to human health (letter), in *The Guardian*. 2001, Dar es Salaam: Tanzania.
18. Blomberg, B., et al. Surveillance of antimicrobial resistance at a tertiary hospital in Tanzania. *BMC Public Health*, 2004. **4**(1): p. 45.
19. The United Republic of Tanzania, The threat of antimicrobial resistance in Tanzania: Time for bold actions. 2017: Dar es Salaam.
20. Mori, A.T., E.A. Kaale, and P. Risha. Reforms: a quest for efficiency or an opportunity for vested interests'? A case study of pharmaceutical policy reforms in Tanzania. *BMC Public Health*, 2013. **13**: p. 651.

Figure 1: Estimated annual economic cost between 2005–2015

Figure 2: Relative contributions of the products to the total economic cost in Tanzania, 2005–2015

Figure 3: Quantities of poor-quality medicines in Tanzania, 2005-2015



1  
2  
3  
4  
5  
6  
7  
8  
9  
10  
11  
12  
13  
14  
15  
16  
17  
18  
19  
20  
21  
22  
23  
24  
25  
26  
27  
28  
29  
30  
31  
32  
33  
34  
35  
36  
37  
38  
39  
40  
41  
42  
43  
44  
45  
46  
47  
48  
49  
50  
51  
52  
53  
54  
55  
56  
57  
58  
59  
60

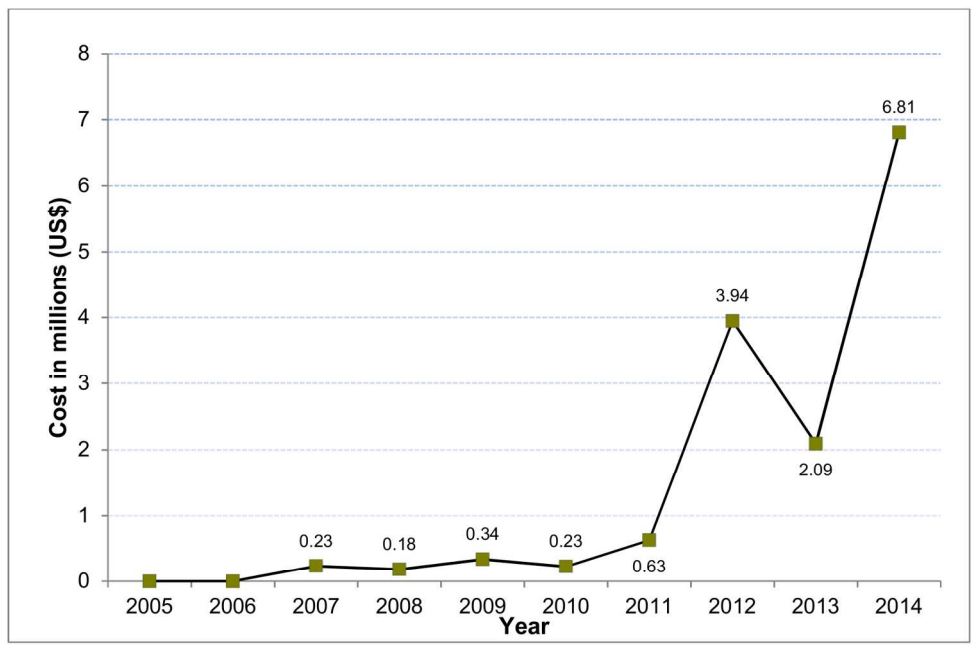

165x113mm (300 x 300 DPI)

Review only

1  
2  
3  
4  
5  
6  
7  
8  
9  
10  
11  
12  
13  
14  
15  
16  
17  
18  
19  
20  
21  
22  
23  
24  
25  
26  
27  
28  
29  
30  
31  
32  
33  
34  
35  
36  
37  
38  
39  
40  
41  
42  
43  
44  
45  
46  
47  
48  
49  
50  
51  
52  
53  
54  
55  
56  
57  
58  
59  
60

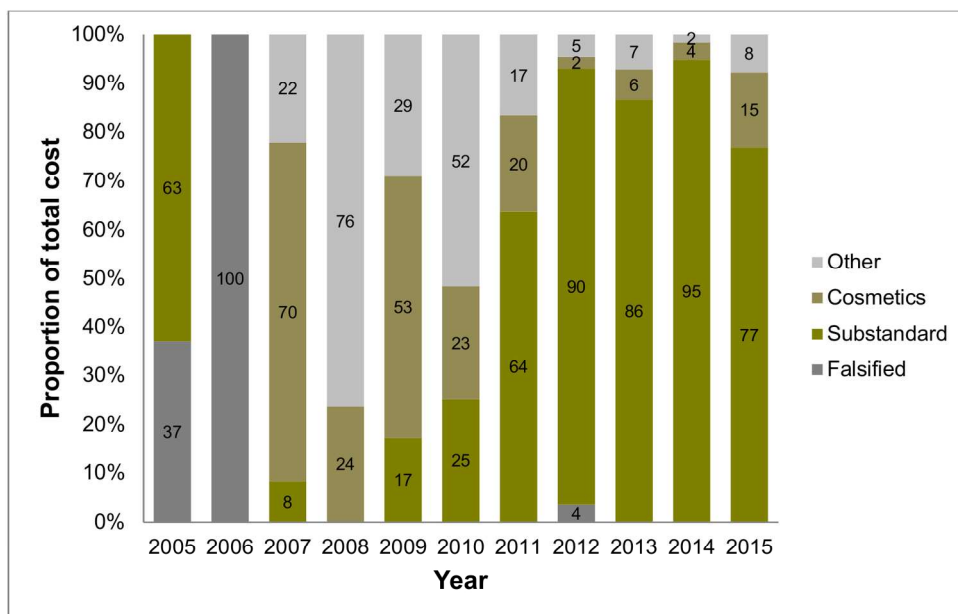

165x107mm (300 x 300 DPI)

view only

1  
2  
3  
4  
5  
6  
7  
8  
9  
10  
11  
12  
13  
14  
15  
16  
17  
18  
19  
20  
21  
22  
23  
24  
25  
26  
27  
28  
29  
30  
31  
32  
33  
34  
35  
36  
37  
38  
39  
40  
41  
42  
43  
44  
45  
46  
47  
48  
49  
50  
51  
52  
53  
54  
55  
56  
57  
58  
59  
60

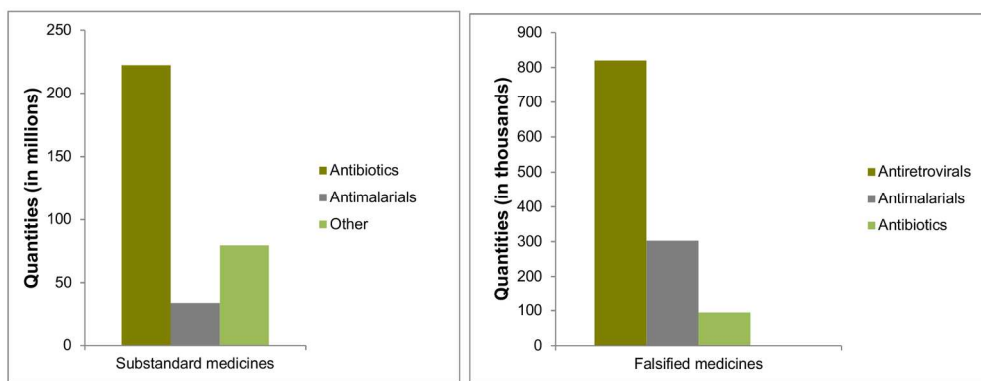

173x68mm (300 x 300 DPI)

Peer review only

# BMJ Open

## Economic cost of substandard and falsified human medicines and cosmetics with banned ingredients in Tanzania from 2005–2015: a retrospective review of data from the regulatory authority

|                                 |                                                                                                                                                                                                                                                                                                                                   |
|---------------------------------|-----------------------------------------------------------------------------------------------------------------------------------------------------------------------------------------------------------------------------------------------------------------------------------------------------------------------------------|
| Journal:                        | <i>BMJ Open</i>                                                                                                                                                                                                                                                                                                                   |
| Manuscript ID                   | bmjopen-2018-021825.R1                                                                                                                                                                                                                                                                                                            |
| Article Type:                   | Research                                                                                                                                                                                                                                                                                                                          |
| Date Submitted by the Author:   | 04-Apr-2018                                                                                                                                                                                                                                                                                                                       |
| Complete List of Authors:       | Mori, Amani; Universitetet i Bergen Institutt for indremedisin, Global Public Health and Primary Care; Muhimbili University of Health and Allied Sciences, School of Pharmacy<br>Meena, Estella; Tanzania Food and Drugs Authority<br>Kaale, Eliangiringa; Muhimbili University of Health and Allied Sciences, School of Pharmacy |
| <b>Primary Subject Heading</b>: | Health economics                                                                                                                                                                                                                                                                                                                  |
| Secondary Subject Heading:      | Global health, Public health                                                                                                                                                                                                                                                                                                      |
| Keywords:                       | Health economics < HEALTH SERVICES ADMINISTRATION & MANAGEMENT, Health & safety < HEALTH SERVICES ADMINISTRATION & MANAGEMENT, PUBLIC HEALTH                                                                                                                                                                                      |
|                                 |                                                                                                                                                                                                                                                                                                                                   |

SCHOLARONE™  
Manuscripts

1  
2  
3  
4 **Economic cost of substandard and falsified human medicines and cosmetics**  
5 **with banned ingredients in Tanzania from 2005–2015: a retrospective review**  
6 **of data from the regulatory authority**  
7  
8  
9

10  
11  
12  
13  
14 Amani Thomas Mori <sup>1,3,\*</sup> , Estella Meena<sup>2</sup>, Eliangiringa A. Kaale<sup>3</sup>  
15  
16  
17  
18  
19

20  
21 <sup>1</sup> Centre for International Health, Department of Global Public Health and Primary Care,  
22 University of Bergen, P.O. Box 7804, 5020 Bergen, Norway  
23  
24

25  
26 <sup>2</sup> Tanzania Food and Drugs Authority, P.O. Box 77150 Dar es Salaam, Tanzania  
27  
28

29 <sup>3</sup> Muhimbili University of Health and Allied Sciences, P.O. Box 65001 Dar es Salaam, Tanzania  
30  
31

32  
33 \* Corresponding author  
34  
35

36 Emails: pax\_amani@yahoo.com  
37

38 Mobile no: +4794433988  
39  
40  
41  
42  
43  
44  
45  
46  
47  
48  
49  
50  
51  
52  
53  
54  
55  
56  
57  
58  
59  
60

## ABSTRACT

**Objective:** To estimate the economic cost of substandard and falsified human medicines and cosmetics with banned ingredients in Tanzania from 2005–2015.

**Design:** A retrospective review of data.

**Setting:** Tanzania Food and Drugs Authority and premises dealing with importations and distributions of pharmaceuticals.

**Eligibility criteria:** Confiscation reports of substandard human medicines, falsified human medicines and cosmetics with banned ingredients.

**Primary and secondary outcome measures:** Quantities and costs of pharmaceutical products, costs of transportation, storage, court cases and disposal of products.

**Results:** The economic cost of substandard and falsified human medicines and cosmetics with banned ingredients was estimated at 16.2 million US\$ i.e. value of substandard medicines 13.7 million US\$ (84.4%), falsified medicines 0.1 million US\$ (1%), cosmetics with banned ingredients 1.3 million US\$ (8%) and other/operational costs 1.1 million US\$ (6.6%). Some of the identified substandard and falsified human medicines include commonly used antibiotics such as phenoxymethylpenicillin, amoxicillin, cloxacillin and co-trimoxazole; antimalarials such quinine, sulfadoxine-pyrimethamine, sulfamethoxypyrazine-pyrimethamine and artemether-lumefantrine; antiretroviral drugs; antipyretics and vitamins among others.

**Conclusion:** The economic cost of substandard and falsified human medicines and cosmetics with banned ingredients represent a relatively large loss of scarce resources for a poor country like Tanzania. We believe that the observed increase in the quantities and the economic cost of these products over time could partly be due to the improvement in the regulatory capacity in terms of human resources, infrastructure and frequency of inspections.

## ARTICLE SUMMARY

### Strengths and limitations of this study

- This is the first study from a low-income country to use national representative data to estimate the economic cost of poor-quality medicines and cosmetics with banned ingredients over a ten-year period.
- We were able to identify the manufactures of substandard medicines and purported manufacturers for falsified medicines, which enabled us to isolate those whose products were more frequently found in the market.
- Some data particularly for cosmetics, were poorly recorded, which made it difficult to apply the proper costing approach of identification, quantification and valuation.
- We could not determine the reasons for the increase in quantities and cost over time, but we believe this could be due to increased availability of data because of improved regulatory capacity and public awareness, as opposed to an absolute increase in the amount of poor-quality medicines and cosmetics.
- We were not able to include patient and health system costs for morbidities and mortalities associated with the use of poor-quality medicines and cosmetics with banned ingredients; hence, the study underestimates the actual economic cost.

## INTRODUCTION

In June 2012, customs officials in Luanda-Angola seized a cargo with about 1.4 million packets of fake Coartem<sup>®</sup> (artemether-lumefantrine) hidden in loudspeakers. The cargo originated from Guangzhou in southern China, and the amount of fake antimalarials was estimated to be enough to treat more than half of all annual malaria cases in Angola [1]. This example highlights the problem of substandard and falsified medicines (defined in **Box 1**) and its potential public health impact. Substandard and falsified medicines represent about 10% of all medicines sold in low- and middle-income countries [2]. Expenditure on these products in low- and middle-income countries is estimated at 30.5 billion US\$ [2]. Falsified medicines represent one of the most lucrative criminal business and is estimated to be worth between 75–200 billion US\$ [3].

The use of substandard and falsified medicines and cosmetics with banned ingredients can have a tremendous negative impact on patient's health, that can range from serious harm to treatment failure that can lead to severe illness and death. It is estimated that between 90,000–200,000 malaria deaths could be prevented if all antimalarials were genuine [4, 5]. Sub-therapeutic plasma levels due to poor-quality medicines are strongly associated with emergence of antimicrobial resistance [6, 7], hence increasing costs of treatment by switching from cheap first-line medicines to more expensive second-line medicines. The pharmaceutical industry is also a victim of falsified medicines, with annual losses estimated at 45 million Euros, which consequently reduces investments in innovative research and development [8].

**Box 1:** Definitions of substandard medicines, falsified medicines

*Substandard medicines:* According to WHO, these are genuine medicines that are authorized by the national medicines authorities, but which fails to meet national or international quality standards or specifications.

*Falsified medicines:* According to WHO, these represent deliberately and fraudulently labeled medicines with respect to identity, composition and source and may include products with the correct or wrong ingredients, without active ingredients, with insufficient active ingredients or with fake packaging [9].



1  
2  
3 Low-income countries are the prime targets of substandard and falsified medicines because  
4 regulatory agencies and law enforcement systems are relatively weak, accompanied by poorly  
5 regulated markets, and scarcity and/or erratic supply of basic medicines [10, 11]. Porous borders  
6 and complex supply chain system of pharmaceuticals also contributes to the problem. There is  
7 scarcity of national level data from low-income countries despite all evidences pointing towards  
8 an increasing problem of substandard and falsified medicines. Therefore, the objective of this  
9 study was to estimate the economic cost of substandard and falsified human medicines including  
10 cosmetics with banned ingredients in Tanzania from 2005–2015.  
11  
12  
13  
14  
15  
16  
17  
18  
19

## 20 **METHODS**

21  
22 This costing study used an ingredient approach to estimate the economic cost of substandard and  
23 falsified human medicines and cosmetics with banned ingredients between 2005–2015. This  
24 method involves identification, quantification and valuation of individual items. Costing was  
25 done from the perspective of the regulatory authority and the pharmaceutical distributors. We did  
26 not include patient and health system costs because of scarcity of data on morbidities and  
27 mortalities likely to be caused by the use of these products.  
28  
29  
30  
31  
32

### 33 **Sources of data**

34  
35  
36 We used data from the regulatory authority and the major importers and distributors of  
37 pharmaceuticals from 2005–2015. The regulatory authority usually keeps all the confiscation  
38 reports for poor-quality medicines and banned cosmetics that are collected during routine  
39 inspections of premises and major operations. The report usually contains among other  
40 information, the name of the premise, generic and brand names of the product, strength, physical  
41 description of the package and products, batch number, manufacturing and expiry dates as well  
42 as the quantities and sometimes an estimated value. Premises usually remain with the signed  
43 copy of the confiscation report. In this study we retrieved all the confiscation data that was  
44 available at the regulatory authority's headquarter and from its zonal offices. We also used  
45 confiscation report forms from the importers and distributors of pharmaceuticals to complement  
46 data from the regulatory authority. This means, in case the report forms were not filed at the  
47 regulatory authority, copies that were available at the importers and distributors offices were  
48  
49  
50  
51  
52  
53  
54  
55  
56  
57  
58  
59  
60

1  
2  
3 used. We were careful to avoid double counting. We also conducted a series of structured  
4 interviews with some officials at the regulatory authority and the importers and distributors of  
5 pharmaceuticals to estimate operational cost incurred in the process of confiscation, withdraw of  
6 products from the market, storage, disposal and proceedings of court cases. Unregistered  
7 medicines do not undergo evaluation and approval by the regulatory authority; hence, together  
8 with the expired human medicines were not included in the cost analysis.  
9  
10  
11  
12  
13

### 14 **Cost estimations**

15  
16 The study used the median buyer prices from the International Drug Price Indicator Guide  
17 (IDPIG) as a primary source of medicines prices and when they were not available the Tanzanian  
18 Medical Stores Price Catalogue of 2015/16 was used. In the absence of median buyer prices, the  
19 median supplier prices were used, with an inflation factor of 10% as recommended in the costing  
20 studies [12]. Prices from the IDPIG were inflated further by 10% to account for local opportunity  
21 costs. Cost was calculated by multiplying the tallied quantities with unit prices for each item. In  
22 some cases, only the estimated value of the items in the local currency were reported without  
23 information about the identity and quantities and this was common for cosmetics. In this case the  
24 total value in the local currency was first converted to US\$ by using relevant exchange rate for  
25 that year before adjusting to the present value using relevant consumer price indices.  
26  
27  
28  
29  
30  
31  
32  
33

34 Once the yearly value of falsified medicines, substandard medicines and cosmetics with banned  
35 ingredients were estimated, we added other/operational costs which included the storage costs,  
36 transportation costs, cost of disposal and cost charges for court cases to arrive to the annual total  
37 cost. We measured the storage area (m<sup>2</sup>) which was multiplied by 10 US\$/m<sup>2</sup> which was the rate  
38 of rental charge used for warehouses by the Tanzania National Housing Corporation (NHC) and  
39 reported by most distributors of pharmaceuticals. Yearly storage costs were obtained by  
40 multiplying monthly rental charges by 12. Storage costs for the importers and distributors was  
41 considered only for the year when there was an incident of confiscation of substandard or  
42 falsified medicine or cosmetics with banned ingredients.  
43  
44  
45  
46  
47  
48  
49  
50

### 51 **Ethical considerations**

52  
53 Ethical approval was obtained from the research and publication committee of the Muhimbili  
54 University of Health and Allied Sciences (MUHAS). The regulatory authority also granted  
55  
56  
57  
58  
59  
60

research permission and issued an official letter to all local importers and distributors requesting them to make the relevant data available to the researchers and assuring them that the data requested will be used for research purpose only. A consent form was provided to all the interviewees and signed prior to interviews.

### Patient and Public Involvement

Patients were not directly involved in the study. However, the research question and outcome measures were informed with concerns for safety and economic wellbeing of patients and the public. Poor-quality medicines and banned cosmetics not only contribute to increased morbidity and mortality but also can cause substantial economic loss to patients, families, health systems and everyone involved with the sale and manufacture of pharmaceuticals.

## RESULTS

### Economic cost

The estimated economic cost of substandard and falsified human medicines and cosmetics with banned ingredients in Tanzania from 2005–2015 was 16.20 million US\$. Substandard medicines contributed 13.65 million US\$, falsified medicines 149,369 US\$ and cosmetics with banned ingredients 1.29 million US\$. Other costs that include transportation, storage, court cases and disposal contributed 1.09 million US\$ (Table 1).

Table 1: Costs of the products and other associated costs

| Year | Cost (US\$) |       |             |      |           |      |            |             |
|------|-------------|-------|-------------|------|-----------|------|------------|-------------|
|      | Falsified   | %     | Substandard | %    | Cosmetics | %    | Other cost | Total cost  |
| 2005 | 33.3        | 37.1  | 56.5        | 62.9 | 0         | 0.0  | 0          | 89.8        |
| 2006 | 49.9        | 100.0 | 0           | 0.0  | 0         | 0.0  | 0<br>0.0   | 49.9        |
| 2007 | 63.8        | 0.0   | 19,424.4    | 8.3  | 162,478.8 | 69.5 | 51,720.9   | 233,688.0   |
| 2008 | 96.7        | 0.1   | 0           | 0.0  | 42,979.2  | 23.6 | 138,929.7  | 182,005.6   |
| 2009 | 1,701.60    | 0.5   | 58,032.3    | 17.2 | 180,158.7 | 53.4 | 97,782.9   | 337,675.5   |
| 2010 | 17.6        | 0.0   | 57,299.5    | 25.1 | 52,983.1  | 23.2 | 117,907.7  | 228,207.9   |
| 2011 | 1,676.4     | 0.3   | 398,474.0   | 63.5 | 123,347.6 | 19.7 | 103,913.3  | 627,411.3   |
| 2012 | 141,493.3   | 3.6   | 3,530,672.6 | 89.5 | 91,968.4  | 2.3  | 180,557.0  | 3,944,691.2 |

|              |                  |            |                     |             |                    |            |                    |                     |
|--------------|------------------|------------|---------------------|-------------|--------------------|------------|--------------------|---------------------|
| 2013         | 2,129.9          | 0.1        | 1,808,340.3         | 86.5        | 131,273.7          | 6.3        | 149,425.8          | 2,091,169.6         |
| 2014         | 1,724.2          | 0.0        | 6,453,613.0         | 94.8        | 240,335.9          | 3.5        | 112,258.6          | 6,807,931.8         |
| 2015         | 382.7            | 0.0        | 1,326,139.4         | 76.8        | 265,326.6          | 15.4       | 134,143.4          | 1,725,992.1         |
| <b>Total</b> | <b>149,369.3</b> | <b>0.9</b> | <b>13,652,052.1</b> | <b>84.4</b> | <b>1,290,852.0</b> | <b>8.0</b> | <b>1,086,639.3</b> | <b>16,178,912.7</b> |

Between 2005 and 2011, the estimated annual economic cost increased from about 90 US\$ to 0.63 million US\$, with some fluctuation in between. The annual cost increased sharply to 3.94 million US\$ in 2012, then dropped to about 2.09 million in 2014. The annual total cost rose again to 6.8 million US\$ the following year (Figure 1). From 2011, substandard medicines contributed two thirds or more of the total cost. In 2006 only falsified medicines were recorded, and in 2007 and 2009 cosmetics contributed more than half of the total cost (Figure 2).

### Quantities

Between 2005 and 2015, there was a total of 519,889,388 and 1,216,630 substandard and falsified human medicines, respectively, that were recorded. Dosage forms were tablets/capsules, suspensions and injections (vials/ampoules). Among the group of substandard medicines, quantities of antibiotics were 222,236,052 (66%), which included 160,087,188 tablets/capsules; 61,957,667 bottles and 191,197 vials/ampoules. (Figure 3). Among the most commonly used antibiotics that were identified are penicillin (83%), which included phenoxymethylpenicillin: 80,812,600 tablets and 65 bottles; amoxicillin: 495,677 capsules and 61,582,700 bottles; cloxacillin: 42,137,592 capsules and 2,766 bottles; co-trimoxazole (Sulfamethoxazole-Trimethoprim): 28,825,400 tablets and 110 bottles (13%); erythromycin 7,185,954 tablets (3%) and ciprofloxacin: 623,265 tablets and 372,000 bottles (0.4%).

Among substandard medicines, quantities of antimalarials were 33,124,501 (10%), which included 33,032,825 tablets/capsules; 90,046 bottles and 1,630 vials/ampoules (Figure 3). Quantities of quinine were: 29,057,100 tablets, 24 bottles and 1,630 ampoules which accounted for 88%; sulfadoxine-pyrimethamine: 3,392,103 tablets and 83 bottles (10%); amodiaquine: 268,543 tablets, 42,400 bottles; Sulfamethoxypyrazine-Pyrimethamine (SP): 216,450 tablets and 10,764 bottles; SP/artesunate: 87,990 tablets; artemether/lumefantrine: 8,640 tablets and 36,775 bottles and chloroquine 2,000 tablets. The group named "Other" which accounted for 24% of substandard human medicines consist of many items including aminophylline 37,374,000 tablets

1  
2  
3 and 2,930 vials (47%), paracetamol 17,413,300 tablets and 50,905 bottles (22%), diazepam  
4 9,141,500 tablets (11%) and prednisolone 7,101,000 tablets (9%) etc.

5  
6  
7 For the group of falsified medicines, there were 819,660 tablets (67%) of antiretrovirals,  
8 followed with antimalarials and antibiotics 302,609 (25%) and 94,200 (8%), respectively (Figure  
9 3). Other groups accounted for negligible percentage. All falsified antiretrovirals were a  
10 combination of stavudine, lamivudine and nevirapine tablets. Among falsified antimalarials,  
11 quantities of quinine tablets were 171,900 (57%); praziquantel-amodiaquine tablets 117,000  
12 (39%); sulfamethoxypyrazine-pyrimethamine 11,704 tablets (4%), sulfadoxine-pyrimethamine  
13 tablets 1,501 (0.5%) and artemether-lumefantrine 504 tablets (0.2%). Falsified antibiotics  
14 included doxycycline capsules 68,000 and cloxacillin capsules 26,200.

15  
16  
17 As for cosmetics, there were 250 metric tons, 833.20 kilograms, 646 cartons and 1,476 items that  
18 were just recorded as 'different types of cosmetics'.  
19  
20  
21

### 22 23 24 25 26 27 28 **Manufacturers of substandard and purported manufacturers of falsified medicines**

29  
30 Table 2 shows generic names of medicines and the anonymized names of manufactures of  
31 substandard medicines and purported manufacturers of falsified, which were repeatedly  
32 circulating in Tanzania between 2005–2015. Note that the letters used to denote manufacturers  
33 do not relate directly to their true names. Phenoxymethylpenicillin, ciprofloxacin,  
34 prednisolone, diazepam and salbutamol from manufacturer N were identified over several years  
35 implying consistent failure to meet Good Manufacturing Practice standards. The same was seen  
36 for manufacturer E, M and B for quinine, paracetamol and aminophylline, respectively.  
37  
38  
39  
40  
41  
42  
43

44 The same observation was also made for falsified medicines, in that falsified products bearing  
45 the name of the same purported manufacturer were consistently found on the market over several  
46 years. Example quinine and sulfamethoxypyrazine-pyrimethamine from manufacturer C and H,  
47 respectively, were identified circulating in the market over 3 years.  
48  
49  
50  
51  
52  
53  
54  
55  
56  
57  
58  
59  
60

Table 2: Manufacturers of commonly identified poor-quality medicines

| Substandard medicines<br>(Manufacturers)         | Year |      |      |      |         |         |         |      |
|--------------------------------------------------|------|------|------|------|---------|---------|---------|------|
|                                                  | 2005 | 2009 | 2010 | 2011 | 2012    | 2013    | 2014    | 2015 |
| Phenoxymethylpenicillin                          |      |      |      | N    | N       | N       |         |      |
| Ciprofloxacin                                    |      |      |      | N    | N       |         |         |      |
| Quinine                                          |      |      |      |      | E       |         | E       |      |
| Prednisolone                                     |      |      | N    | N    | N       | N       |         |      |
| Paracetamol                                      |      |      |      |      | M       |         |         | M    |
| Diazepam                                         |      |      |      | N    | N       | N       |         | N    |
| Aminophylline                                    |      |      |      |      |         |         | B       | B    |
| Salbutamol                                       |      |      |      | N    | N       | N       |         |      |
|                                                  |      |      |      |      |         |         |         |      |
| Falsified medicines<br>(Purported manufacturers) | Year |      |      |      |         |         |         |      |
|                                                  | 2005 | 2008 | 2009 | 2011 | 2012    | 2013    | 2014    | 2015 |
| Quinine tablets                                  | B    |      |      |      | C       | B, C, D | C, D, E | B, C |
| Sulfamethoxypyrazine/Pyrimethamine               |      |      | H    | H, B |         | H, B    |         | K    |
| Sulfadoxine-Pyrimethamine                        |      |      |      |      | E, I, J | E       | C, J    |      |
| Halofantrine Hydrochloride                       | A    |      |      |      |         | A       |         |      |
| Artemether-Lumefantrine                          |      | F    |      | F    |         |         |         |      |
| Dihydroartemisinin-Piperaquine                   |      | G    | G    |      |         |         |         |      |

\* Letter codes represent anonymized names of manufacturer or purported manufacturers

## DISCUSSION

It is difficult to estimate the actual economic cost of substandard and falsified medicines in any country not least in a low-income setting because data are usually not available [13]. However, using data from the regulatory authority, pharmaceutical importers and distributors we were able to estimate this burden in Tanzania. Our findings show that the estimated economic cost of substandard and falsified human medicines and cosmetics with banned ingredients in Tanzania between 2005–2015 was 16.20 million US\$. Generally, the economic burden shows an increasing trend and the substandard medicines contribute the largest proportion of the total costs. The estimated economic cost represents 0.24% of the GDP, which is relatively large considering that Tanzania is one of the poorest countries in the world.

Based on the existing data, our analysis shows that there were large quantities of substandard and less falsified human medicines in Tanzania over the past ten years. This include commonly used inexpensive antibiotics such as phenoxymethylpenicillin, amoxicillin, cloxacillin, erythromycin, sulfamethoxazole-trimethoprim; antimalarials such as quinine, sulfadoxine-pyrimethamine, sulfamethoxyprazine-pyrimethamine and antiretrovirals among others. Use of poor-quality medicines is one of the main causes of antimicrobial resistance, which was recently declared by WHO as a major global public health threat as it causes treatment to be difficult and more expensive [2, 14]. Several studies have reported high levels of antibiotic resistance in Tanzania especially for commonly used and cheap antibiotics [15-18], which has prompted the government to develop a national action plan to curb antimicrobial resistance [19].

### **Policy implications**

The quantities and the economic cost of substandard and falsified human medicines including cosmetics with banned ingredients in Tanzania over the past ten years is alarming. Policy-makers in Tanzania need to continue to improve the existing post-marketing surveillance (PMS) and pharmacovigilance (PV) system for effective prevention, detection and response to poor-quality products, adverse effects and other medicines-related health and economic problems. An effective PMS and PV systems are essential components of any healthcare system. However, in low-income countries including Tanzania such systems are weak or non-existent, hence health problems associated with the use of substandard and falsified medicines such as adverse reactions, ineffective treatment or even death often go undetected.

The government and policy makers need to provide more resources to the regulatory authorities in Tanzania to enhance supervision and inspection to ensure integrity of the supply chain of pharmaceuticals both in the public and the private sectors. Limited access to affordable essential medicines in the public health system has resulted in the opening of many private retail pharmacies and small accredited drug dispensing outlets in the country, which have proved very difficult to control [20]. As a consequence, malpractices are common including selling medicines without prescriptions, stocking medicines from unofficial sources, poor documentation and hiring of people without the required qualifications, making them the prime target for the business of substandard and falsified medicines [13].



1  
2  
3 The fact that some substandard and falsified human medicines from certain manufacturers were  
4 confiscated over several years raise a more serious concern. This was observed for example for  
5 falsified quinine tablets purporting to be from manufacturer B and C, and sulfamethoxypyrazine-  
6 pyrimethamine tablets mimicking that of manufacturer H. There could be several reasons behind  
7 this; first it could indicate a sign of insufficient inspection or ineffective removal of the product  
8 from the market. Secondly, it could be that the products were easy to be falsified and smuggled  
9 into the country; thirdly, poor compliance with Good Manufacturing Practices and lastly it could  
10 also imply that the culprits were not identified, or if identified the sanctions were not deterrent,  
11 hence continued to supply the products.  
12  
13  
14  
15  
16  
17  
18  
19

### 20 **Strengths and limitations**

21  
22 To the best of our knowledge, this is the first study to systematically combine data retrieved from  
23 the regulatory authority, importers and distributors of pharmaceuticals to estimate the economic  
24 cost of substandard and falsified medicines and cosmetics with banned ingredients in a low-  
25 income country. The data also facilitated the identification of the manufactures of substandard  
26 medicines and manufacturers whose products were falsified, which enabled us to isolate those  
27 whose products were repetitively found circulating in the market. However, this study has  
28 several limitations. Firstly, we did not have morbidity and mortality data to facilitate the  
29 inclusion of patient and health system costs associated with the use of poor-quality medicines  
30 and cosmetics with banned ingredients. This means our study underestimates the actual  
31 economic cost of these products. Secondly, some data was poorly recorded, which made it  
32 difficult to follow the proper costing procedure of identification, quantification and valuation.  
33 Thirdly, we were not able to determine the reasons behind the increasing quantities and costs.  
34 However, we believe this could be due to improvement in regulatory capacity and public  
35 awareness rather than an absolute increase in the amount of poor-quality medicines and banned  
36 cosmetics.  
37  
38  
39  
40  
41  
42  
43  
44  
45  
46  
47  
48  
49

### 50 **CONCLUSION**

51  
52  
53 The economic cost of substandard and falsified human medicines and cosmetics with banned  
54 ingredients represent a relatively large loss of scarce resources for a low-income country like  
55  
56  
57  
58  
59  
60



1  
2  
3 Tanzania. The increase in the quantities identified and the economic cost of these products over  
4 time could partly be due to improved regulatory capacity in terms of human resources,  
5 infrastructure, frequency of inspections, implementation of post-marketing surveillance,  
6 establishment of more zone offices, and strengthened quality control laboratory with WHO  
7 prequalification. These improvements in addition to efforts by the authority and the government  
8 to increase awareness among stakeholders could have positive and sustainable impact in the  
9 longer term. However, proliferation of retail drug outlets that are difficult to regulate and  
10 ineffective control of many porous borders will continue to be a challenge to the regulatory  
11 authority. Policy-makers should make the fight against substandard and falsified medicines a  
12 national priority agenda, including development of national strategies and action plans.  
13  
14  
15  
16  
17  
18  
19  
20

### 21 **Funding**

22  
23  
24 This research received no specific grant from any funding agency in the public, commercial or  
25 not-for-profit sectors.  
26  
27

### 28 **Competing interests**

29  
30 None  
31  
32

### 33 **Contributors**

34  
35 ATM and EK conceived the idea of the study; ATM, EM and EK designed the study. EM  
36 collected the data. ATM and EM analyzed the data. ATM and EM wrote the first draft of the  
37 manuscript. All authors approved the final version of the manuscript.  
38  
39  
40

### 41 **Data sharing**

42  
43 There is no unpublished data for this study  
44  
45

### 46 **Acknowledgements**

47 We thank the University of Bergen for providing open access publication fund to ATM. We also  
48 thank the Tanzanian Food and Drugs Authority and the involved importers and distributors of  
49 pharmaceuticals for their support in conducting the study.  
50  
51  
52  
53  
54  
55  
56  
57  
58  
59  
60

**REFERENCES**

1. Faucon B, Murphy C, and Whalen J. Africa's Malaria Battle: Fake Drug Pipeline Undercuts Progress, in The Wallstreet Journal. 2013: London. [Cited 2017 June 13]: Available at: <https://www.wsj.com/articles/SB10001424127887324474004578444942841728204>.
2. WHO. A study on the public health and socioeconomic impact of substandard and falsified medical products. 2017, World Health Organization: Geneva.
3. WHO. Counterfeit medicines. Revised Feb 2006. Fact sheet No. 275. 2006, World Health Organization: Geneva
4. Renschler, J.P., et al., Estimated Under-Five Deaths Associated with Poor-Quality Antimalarials in Sub-Saharan Africa. *Am J Trop Med Hyg*, 2015. **92**(Suppl 6): p. 119-26.
5. Clarke E, Counterfeit Medicines: The Pills That Kill in Telegraph. 2008 London [Cited 2017 June 13]: Available at: <http://www.telegraph.co.uk/news/health/3354135/Counterfeit-medicines-the-pills-that-kill.html>.
6. Lipsitch, M. and B.R. Levin. The population dynamics of antimicrobial chemotherapy. *Antimicrob Agents Chemother*, 1997. **41**(2): p. 363-73.
7. Pisani E. Antimicrobial resistance: What does medicine quality have to do with it? Review on Antimicrobial Resistance, 2015.
8. United Nations Interregional Crime and Justice Research Institute, Counterfeit Medicines and Organized Crime. 2012: Turin.
9. WHO. Seventieth World Health Assembly update, 29 May 2017. Geneva.
10. Caudron, J.M., et al., Substandard medicines in resource-poor settings: a problem that can no longer be ignored. *Trop Med Int Health*, 2008. **13**(8): p. 1062-72.
11. Newton, P.N., M.D. Green, and F.M. Fernandez. Impact of poor-quality medicines in the 'developing' world. *Trends Pharmacol Sci*, 2010. **31**(3): p. 99-101.

12. Management Science for Health. International Drug Price Indicator Guide, ed. J.E. Frye. Vol. 2014 Edition. Center for Pharmaceutical Management, Virginia: World Health Organization.
13. IOM (Institute of Medicine),.Countering the Problem of Falsified and Substandard Drugs. 2013, Washington, DC: National Academies Press.
14. WHO. Antimicrobia Resistance: Global Report on Surveillance. 2014: Geneva.
15. Blomberg, B., Antimicrobial resistance in bacterial infections in urban and rural Tanzania, in Institute of medicine Center for International health 2007, Bergen Norway: [http://bora.uib.no/bitstream/handle/1956/2265/Main\\_Thesis\\_Blomberg.pdf](http://bora.uib.no/bitstream/handle/1956/2265/Main_Thesis_Blomberg.pdf).
16. Moremi, N., H. Claus, and S.E. Mshana. Antimicrobial resistance pattern: a report of microbiological cultures at a tertiary hospital in Tanzania. *BMC Infect Dis*, 2016. **16**(1): p. 756.
17. Blomberg, B. Fake medicines, a threat to human health (letter), in *The Guardian*. 2001, Dar es Salaam: Tanzania.
18. Blomberg, B., et al. Surveillance of antimicrobial resistance at a tertiary hospital in Tanzania. *BMC Public Health*, 2004. **4**(1): p. 45.
19. The United Republic of Tanzania, The threat of antimicrobial resistance in Tanzania: Time for bold actions. 2017: Dar es Salaam.
20. Mori, A.T., E.A. Kaale, and P. Risha. Reforms: a quest for efficiency or an opportunity for vested interests'? A case study of pharmaceutical policy reforms in Tanzania. *BMC Public Health*, 2013. **13**: p. 651.

1  
2  
3  
4  
5  
6  
7  
8  
9  
10  
11 Figure 1: Estimated annual economic cost between 2005–2015  
12  
13  
14  
15

16 Figure 2: Relative contributions of the products to the total economic cost in Tanzania, 2005–  
17 2015  
18  
19  
20

21 Figure 3: Quantities of poor-quality medicines in Tanzania, 2005-2015  
22  
23  
24  
25  
26  
27  
28  
29  
30  
31  
32  
33  
34  
35  
36  
37  
38  
39  
40  
41  
42  
43  
44  
45  
46  
47  
48  
49  
50  
51  
52  
53  
54  
55  
56  
57  
58  
59  
60

1  
2  
3  
4  
5  
6  
7  
8  
9  
10  
11  
12  
13  
14  
15  
16  
17  
18  
19  
20  
21  
22  
23  
24  
25  
26  
27  
28  
29  
30  
31  
32  
33  
34  
35  
36  
37  
38  
39  
40  
41  
42  
43  
44  
45  
46  
47  
48  
49  
50  
51  
52  
53  
54  
55  
56  
57  
58  
59  
60



165x113mm (300 x 300 DPI)

Review only

1  
2  
3  
4  
5  
6  
7  
8  
9  
10  
11  
12  
13  
14  
15  
16  
17  
18  
19  
20  
21  
22  
23  
24  
25  
26  
27  
28  
29  
30  
31  
32  
33  
34  
35  
36  
37  
38  
39  
40  
41  
42  
43  
44  
45  
46  
47  
48  
49  
50  
51  
52  
53  
54  
55  
56  
57  
58  
59  
60

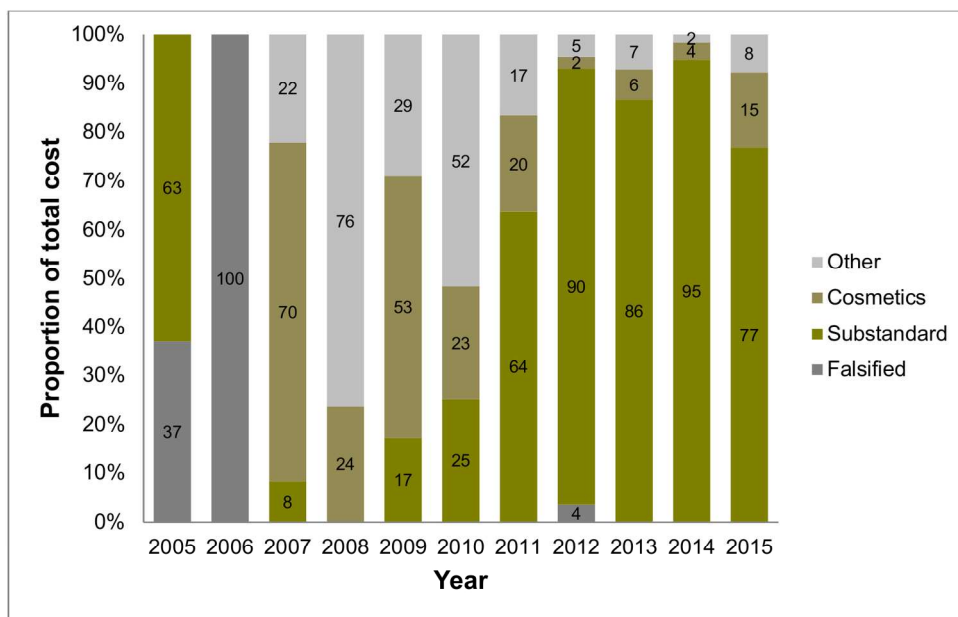

165x107mm (300 x 300 DPI)

view only

1  
2  
3  
4  
5  
6  
7  
8  
9  
10  
11  
12  
13  
14  
15  
16  
17  
18  
19  
20  
21  
22  
23  
24  
25  
26  
27  
28  
29  
30  
31  
32  
33  
34  
35  
36  
37  
38  
39  
40  
41  
42  
43  
44  
45  
46  
47  
48  
49  
50  
51  
52  
53  
54  
55  
56  
57  
58  
59  
60



173x68mm (300 x 300 DPI)

Peer review only



## Table

Table 1 | CHEERS checklist—Items to include when reporting economic evaluations of health interventions

| Section/Item                                           | Item No | Recommendation                                                                                                                                                                                                                                                                                                                                        | Reported on page No/line No |
|--------------------------------------------------------|---------|-------------------------------------------------------------------------------------------------------------------------------------------------------------------------------------------------------------------------------------------------------------------------------------------------------------------------------------------------------|-----------------------------|
| <b>Title and abstract</b>                              |         |                                                                                                                                                                                                                                                                                                                                                       |                             |
| Title                                                  | 1       | Identify the study as an economic evaluation or use more specific terms such as "cost-effectiveness analysis", and describe the interventions compared.                                                                                                                                                                                               | 1 line 4-6                  |
| Abstract                                               | 2       | Provide a structured summary of objectives, perspective, setting, methods (including study design and inputs), results (including base case and uncertainty analyses), and conclusions.                                                                                                                                                               | 2                           |
| <b>Introduction</b>                                    |         |                                                                                                                                                                                                                                                                                                                                                       |                             |
| Background and objectives                              | 3       | Provide an explicit statement of the broader context for the study.                                                                                                                                                                                                                                                                                   | 4-5                         |
|                                                        |         | Present the study question and its relevance for health policy or practice decisions.                                                                                                                                                                                                                                                                 | 5 line 3-16                 |
| <b>Methods</b>                                         |         |                                                                                                                                                                                                                                                                                                                                                       |                             |
| Target population and subgroups                        | 4       | Describe characteristics of the base case population and subgroups analysed, including why they were chosen.                                                                                                                                                                                                                                          | -                           |
| Setting and location                                   | 5       | State relevant aspects of the system(s) in which the decision(s) need(s) to be made.                                                                                                                                                                                                                                                                  | 5 line 36-40                |
| Study perspective                                      | 6       | Describe the perspective of the study and relate this to the costs being evaluated.                                                                                                                                                                                                                                                                   | 5 line 26-28                |
| Comparators                                            | 7       | Describe the interventions or strategies being compared and state why they were chosen.                                                                                                                                                                                                                                                               | -                           |
| Time horizon                                           | 8       | State the time horizon(s) over which costs and consequences are being evaluated and say why appropriate.                                                                                                                                                                                                                                              | 5 line 24                   |
| Discount rate                                          | 9       | Report the choice of discount rate(s) used for costs and outcomes and say why appropriate.                                                                                                                                                                                                                                                            | -                           |
| Choice of health outcomes                              | 10      | Describe what outcomes were used as the measure(s) of benefit in the evaluation and their relevance for the type of analysis performed.                                                                                                                                                                                                               | -                           |
| Measurement of effectiveness                           | 11a     | <i>Single study-based estimates:</i> Describe fully the design features of the single effectiveness study and why the single study was a sufficient source of clinical effectiveness data.                                                                                                                                                            | -                           |
|                                                        | 11b     | <i>Synthesis-based estimates:</i> Describe fully the methods used for identification of included studies and synthesis of clinical effectiveness data.                                                                                                                                                                                                | -                           |
| Measurement and valuation of preference based outcomes | 12      | If applicable, describe the population and methods used to elicit preferences for outcomes.                                                                                                                                                                                                                                                           | -                           |
| Estimating resources and costs                         | 13a     | <i>Single study-based economic evaluation:</i> Describe approaches used to estimate resource use associated with the alternative interventions. Describe primary or secondary research methods for valuing each resource item in terms of its unit cost. Describe any adjustments made to approximate to opportunity costs.                           | -                           |
|                                                        | 13b     | <i>Model-based economic evaluation:</i> Describe approaches and data sources used to estimate resource use associated with model health states. Describe primary or secondary research methods for valuing each resource item in terms of its unit cost. Describe any adjustments made to approximate to opportunity costs.                           | -                           |
| Currency, price date, and conversion                   | 14      | Report the dates of the estimated resource quantities and unit costs. Describe methods for adjusting estimated unit costs to the year of reported costs if necessary. Describe methods for converting costs into a common currency base and the exchange rate.                                                                                        | 6 line 16-32                |
| Choice of model                                        | 15      | Describe and give reasons for the specific type of decision-analytical model used. Providing a figure to show model structure is strongly recommended.                                                                                                                                                                                                | -                           |
| Assumptions                                            | 16      | Describe all structural or other assumptions underpinning the decision-analytical model.                                                                                                                                                                                                                                                              | -                           |
| Analytical methods                                     | 17      | Describe all analytical methods supporting the evaluation. This could include methods for dealing with skewed, missing, or censored data; extrapolation methods; methods for pooling data; approaches to validate or make adjustments (such as half cycle corrections) to a model; and methods for handling population heterogeneity and uncertainty. | -                           |
| <b>Results</b>                                         |         |                                                                                                                                                                                                                                                                                                                                                       |                             |
| Study parameters                                       | 18      | Report the values, ranges, references, and, if used, probability distributions for all parameters. Report reasons or sources for distributions used to represent uncertainty where appropriate. Providing a table to show the input values is strongly recommended.                                                                                   | -                           |
| Incremental costs and outcomes                         | 19      | For each intervention, report mean values for the main categories of estimated costs and outcomes of interest, as well as mean differences between the comparator groups. If applicable, report incremental cost-effectiveness ratios.                                                                                                                | -                           |
| Characterising uncertainty                             | 20a     | <i>Single study-based economic evaluation:</i> Describe the effects of sampling uncertainty for the estimated incremental cost and incremental effectiveness parameters, together with the impact of methodological assumptions (such as discount rate, study perspective).                                                                           | ✓                           |



## RESEARCH METHODS &amp; REPORTING

(continued)

| Section/item                                                         | Item No | Recommendation                                                                                                                                                                                                                                                             | Reported on page No/line No |
|----------------------------------------------------------------------|---------|----------------------------------------------------------------------------------------------------------------------------------------------------------------------------------------------------------------------------------------------------------------------------|-----------------------------|
|                                                                      | 20b     | <i>Model-based economic evaluation</i> : Describe the effects on the results of uncertainty for all input parameters, and uncertainty related to the structure of the model and assumptions.                                                                               | —                           |
| Characterising heterogeneity                                         | 21      | If applicable, report differences in costs, outcomes, or cost-effectiveness that can be explained by variations between subgroups of patients with different baseline characteristics or other observed variability in effects that are not reducible by more information. | —                           |
| <b>Discussion</b>                                                    |         |                                                                                                                                                                                                                                                                            |                             |
| Study findings, limitations, generalisability, and current knowledge | 22      | Summarise key study findings and describe how they support the conclusions reached. Discuss limitations and the generalisability of the findings and how the findings fit with current knowledge.                                                                          | 7e-12                       |
| <b>Other</b>                                                         |         |                                                                                                                                                                                                                                                                            |                             |
| Source of funding                                                    | 23      | Describe how the study was funded and the role of the funder in the identification, design, conduct, and reporting of the analysis. Describe other non-monetary sources of support.                                                                                        | 13 line 9-10                |
| Conflicts of interest                                                | 24      | Describe any potential for conflict of interest of study contributors in accordance with journal policy. In the absence of a journal policy, we recommend authors comply with International Committee of Medical Journal Editors recommendations.                          | 13 line 15                  |

For consistency, the CHEERS statement checklist format is based on the format of the CONSORT statement checklist
